# Supplementary material
Source: HighWire-hosted journal article supplement (http://www.cmaj.ca/highwire/filestream/59191/field_highwire_adjunct_files/8/screen-wong-8-at.pdf)
Supplement: screen-wong-8-at.pdf [file screen-wong-8-at.pdf]

| <b>Appendix 8 (as submitted by the authors): Cost-Effectiveness Results for different prevalence assumptions</b>                                                                                                                                                                                                    |                                                                         |                                                  |              |              |               |             |                        |
|---------------------------------------------------------------------------------------------------------------------------------------------------------------------------------------------------------------------------------------------------------------------------------------------------------------------|-------------------------------------------------------------------------|--------------------------------------------------|--------------|--------------|---------------|-------------|------------------------|
|                                                                                                                                                                                                                                                                                                                     |                                                                         | <b>Compare to Common baseline (No Screening)</b> |              |              |               |             |                        |
| <b>Prevalence</b>                                                                                                                                                                                                                                                                                                   | <b>Strategy</b>                                                         | <b>Cost</b>                                      | <b>QALYs</b> | <b>ΔCost</b> | <b>ΔQALYs</b> | <b>ICER</b> | <b>Sequential ICER</b> |
| 0.2%                                                                                                                                                                                                                                                                                                                | No screening                                                            | \$71,284                                         | 13.7792      | -            | -             | -           | -                      |
|                                                                                                                                                                                                                                                                                                                     | Screen & treat with PR                                                  | \$71,352                                         | 13.7803      | \$68         | 0.0011        | \$62,191    | \$62,191*              |
|                                                                                                                                                                                                                                                                                                                     | Screen & treat with<br>G1: IFN-Free DAA<br>G2/3: SOF/RBV<br>G4/5/6: PR  | \$71,397                                         | 13.7818      | \$113        | 0.0026        | \$43,844    | \$43,844               |
|                                                                                                                                                                                                                                                                                                                     | Screen & treat with<br>G1: simeprevir+PR<br>G2/3: SOF/RBV<br>G4/5/6: PR | \$71,397                                         | 13.7813      | \$114        | 0.0021        | \$53,078    | Dominated              |
|                                                                                                                                                                                                                                                                                                                     | No screening                                                            | \$71,319                                         | 13.7685      | -            | -             | -           | -                      |
| 0.5%                                                                                                                                                                                                                                                                                                                | Screen & treat with PR                                                  | \$71,430                                         | 13.7713      | \$112        | 0.0027        | \$41,086    | \$41,086*              |
|                                                                                                                                                                                                                                                                                                                     | Screen & treat with<br>G1: IFN-Free DAA<br>G2/3: SOF/RBV<br>G4/5/6: PR  | \$71,544                                         | 13.7750      | \$225        | 0.0065        | \$34,864    | \$34,864               |
|                                                                                                                                                                                                                                                                                                                     | Screen & treat with<br>G1:simeprevir+PR<br>G2/3: SOF/RBV<br>G4/5/6: PR  | \$71,545                                         | 13.7739      | \$226        | 0.0054        | \$42,170    | Dominated              |
|                                                                                                                                                                                                                                                                                                                     | No screening                                                            | \$71,436                                         | 13.7330      | -            | -             | -           | -                      |
|                                                                                                                                                                                                                                                                                                                     | Screen & treat with PR                                                  | \$71,694                                         | 13.7411      | \$258        | 0.0082        | \$31,597    | \$31,597*              |
| 1.5%                                                                                                                                                                                                                                                                                                                | Screen & treat with<br>G1: IFN-Free DAA<br>G2/3: SOF/RBV<br>G4/5/6: PR  | \$72,034                                         | 13.7524      | \$598        | 0.0194        | \$30,876    | \$30,876               |
|                                                                                                                                                                                                                                                                                                                     | Screen & treat with<br>G1:simeprevir+PR<br>G2/3: SOF/RBV<br>G4/5/6: PR  | \$72,036                                         | 13.7490      | \$600        | 0.0161        | \$37,375    | Dominated              |
|                                                                                                                                                                                                                                                                                                                     | No screening                                                            | \$71,436                                         | 13.7330      | -            | -             | -           | -                      |
|                                                                                                                                                                                                                                                                                                                     | Screen & treat with PR                                                  | \$71,694                                         | 13.7411      | \$258        | 0.0082        | \$31,597    | \$31,597*              |
|                                                                                                                                                                                                                                                                                                                     | Screen & treat with<br>G1: IFN-Free DAA<br>G2/3: SOF/RBV<br>G4/5/6: PR  | \$72,034                                         | 13.7524      | \$598        | 0.0194        | \$30,876    | \$30,876               |
| G1: genotype 1; G2/3: genotype 2 or 3; G4/5/6: genotype 4 or 5 or 6; PR = pegylated interferon plus ribavirin; QALY = quality-adjusted life-year; SIM = simeprevir; SOF/RBV = sofosbuvir plus ribavirin; IFN-Free DAA = interferon-free direct-acting antiviral agents; ICER = incremental cost-effectiveness ratio |                                                                         |                                                  |              |              |               |             |                        |

Appendix to: Wong WWL, Tu HA, Feld JJ, et al. Cost-effectiveness of screening for hepatitis C in Canada. *CMAJ* 2015. DOI:10.1503/cmaj.140711.

Copyright © 2015 The Author(s) or their employer(s).

To receive this resource in an accessible format, please contact us at [cmajgroup@cmaj.ca](mailto:cmajgroup@cmaj.ca)

<sup>a</sup>Extendedly dominated = the combination of two other alternatives dominated the treatment.
